# Supplementary material for: Simple and Specific Dual‐Wavelength Excitable Dye Staining for Glycoprotein Detection in Polyacrylamide Gels and Its Application in Glycoproteomics
Source: Hindawi journal article supplement (doi:10.1155/2011/780108), 2011-01-01
Supplement: f1 [file 780108.f1.pdf]

## Supplemental information

Figure-S1. The UV-visible spectrum of LRSH.

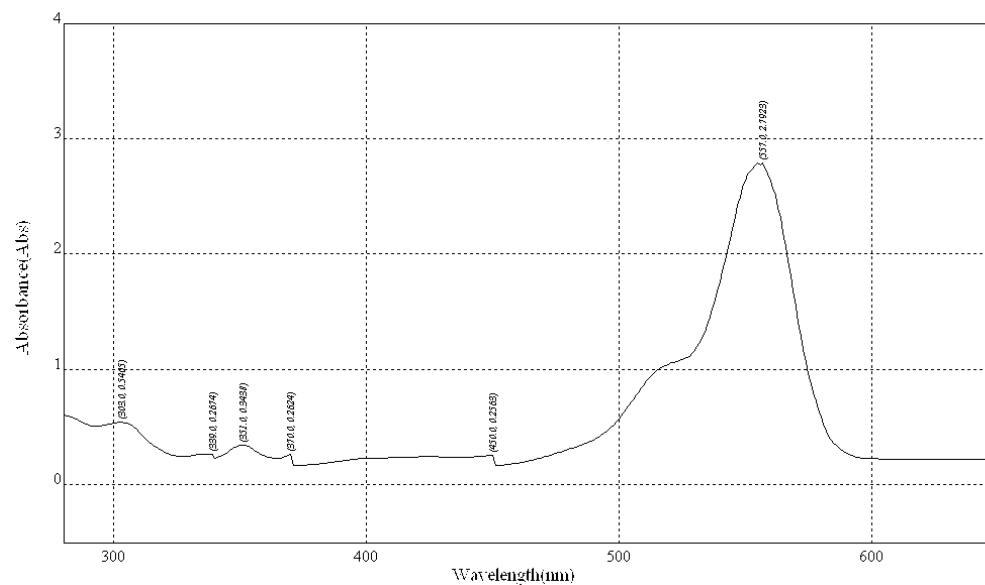

Figure-S2. The fluorescence spectra of LRSH at the same concentration excited at different wavelengths. (A) Excitation at 557 nm. (B) Excitation at 532nm. (C) Excitation at 305nm.

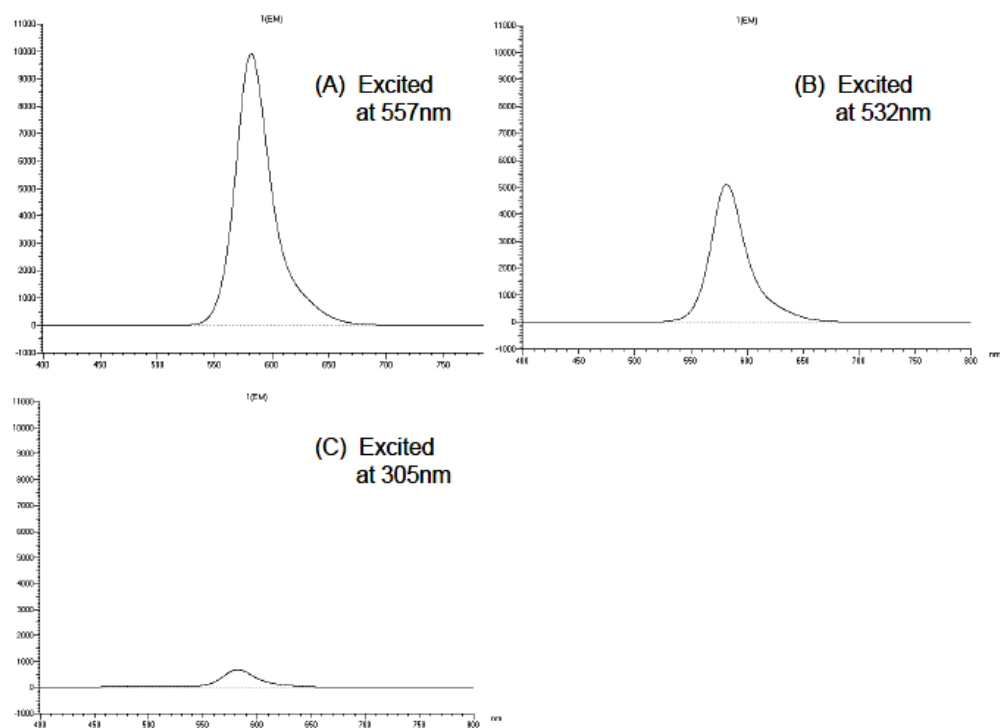

Figure S3. Detection limits comparison between LRSH and Pro-Q Emerald<sup>®</sup> 300 staining.

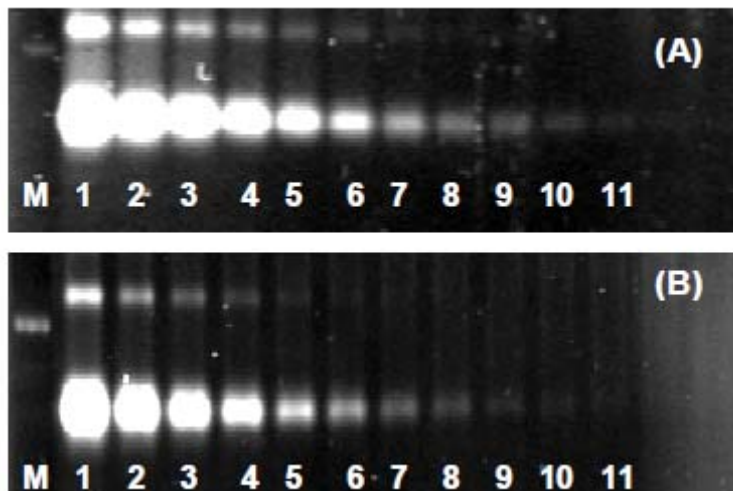

(A) Pro-Q Emerald<sup>®</sup> 300 and (B) LRSH staining. Two-fold serial dilutions of  $\alpha$ 1-acid glycoproteins, ranging from 1 $\mu$ g to 0.95ng, are displayed in Lane 1 to Lane 11. M denotes molecular weight markers.

Figure S4. Linearity assay of in-gel LRSH staining examined using different imagers.

(A) Linearity assay (gel image acquired using a Typhoon 9210)

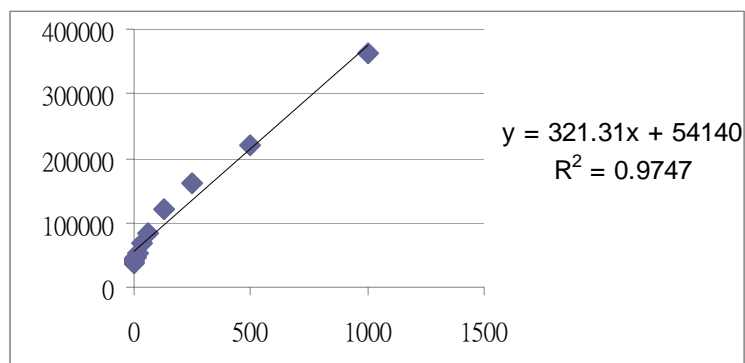

(B) Linearity assay (gel image acquired using a 305-nm UV transilluminator)

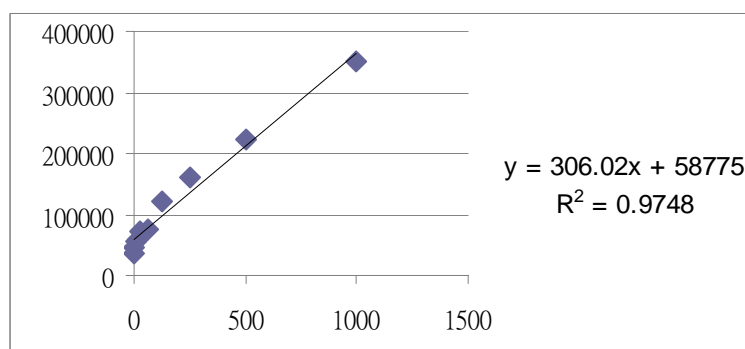

Figure S5. Specificity comparison between LRSH and Pro-Q Emerald<sup>®</sup> 300 staining.

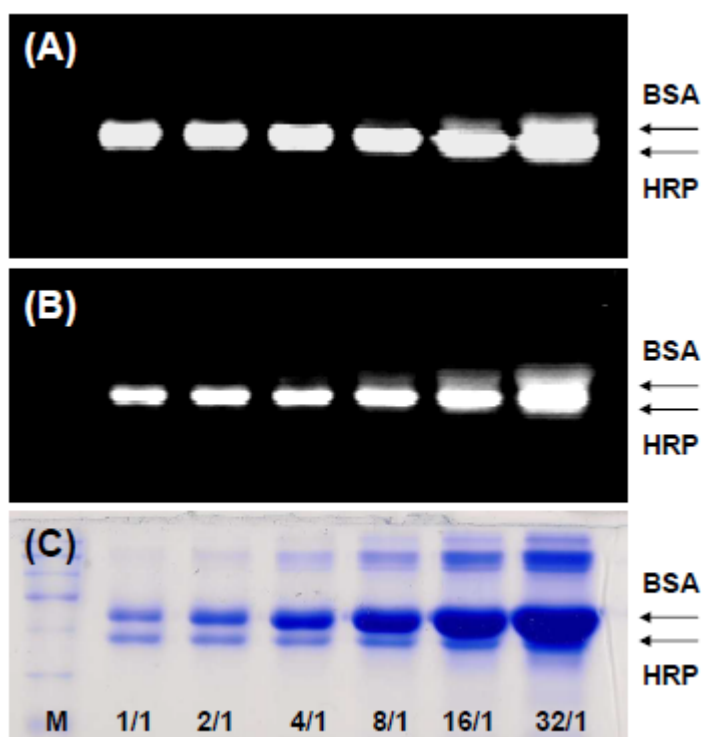

Two-fold serial increases in the nonglycoprotein (BSA) / glycoprotein (horseradish peroxidase, HRP) ratio, ranging from 1/1 to 32/1. M represents standard protein molecular weight markers. (A) Pro-Q Emerald<sup>®</sup> 300 staining. (B) LRSH staining. (C) Post-staining of the same gel with Coomassie blue.

Figure S6. MS/MS spectrum of the other deglycosylated peptide NETHATYSNTLYLADEIIIR. N represents the deglycosylation site.

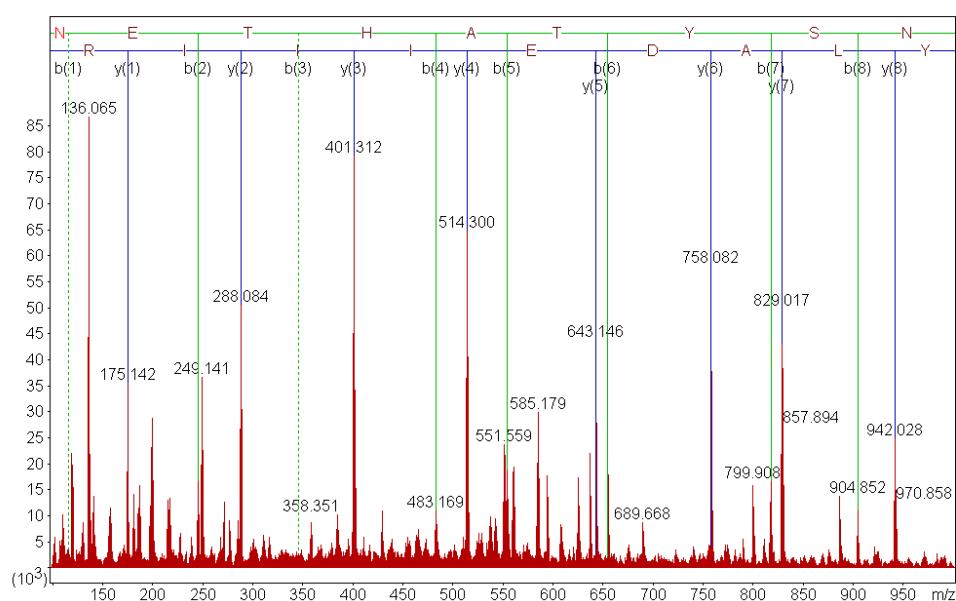

Table S1.

| UROM_HUMAN        |          |          |       |                                  |
|-------------------|----------|----------|-------|----------------------------------|
| Uromodulin        |          |          |       |                                  |
| Mass: 72451       |          |          |       |                                  |
| Total Score: 1563 |          |          |       |                                  |
| Start - End       | Observed | Mr(calc) | Score | Peptide                          |
| 548 - 554         | 457.70   | 913.44   | 37    | R.FSVQMFR.F                      |
| 520 - 526         | 477.64   | 953.49   | 48    | K.YFIIQDR.C                      |
| 179 - 185         | 491.57   | 981.45   | 47    | R.TLDEYWR.S                      |
| 450 - 459         | 512.57   | 1023.51  | 75    | R.VGGTGMFTVR.M                   |
| 386 - 395         | 538.12   | 1074.51  | 67    | R.DGPCGTVLTR.N                   |
| 357 - 365         | 559.21   | 1116.52  | 65    | K.VFMYLSDSR.C                    |
| 376 - 385         | 565.22   | 1128.59  | 77    | R.DWVSVVTPAR.D                   |
| 213 - 222         | 588.34   | 1174.58  | 61    | R.MAETCVPVLR.C                   |
| 437 - 449         | 707.27   | 1412.78  | 106   | K.TALQPMVSALNIR.V                |
| 421 - 432         | 729.73   | 1457.66  | 75    | K.INFACSYPLDMK.V                 |
| 373 - 385         | 505.45   | 1513.76  | 41    | R.DNRDWVSVVTPAR.D                |
| 532 - 547         | 853.59   | 1704.79  | 108   | R.DSTIQVVENGESSQGR.F             |
| 179 - 185         | 868.64   | 1735.69  | 99    | R.STEYGEGYACD <del>T</del> DLR.G |
| 376 - 395         | 729.55   | 2185.09  | 39    | R.DWVSVVTPARDGPCGTVLTR.N         |
| 450 - 459         | 520.63   | 1039.51  | 75    | R.VGGTGMFTVR.M + Oxidation (M)   |
| 357 - 365         | 567.16   | 1132.52  | 40    | K.VFMYLSDSR.C + Oxidation (M)    |
| 213 - 222         | 596.16   | 1190.57  | 77    | R.MAETCVPVLR.C + Oxidation (M)   |
| 437 - 449         | 715.32   | 1428.77  | 85    | TALQPMVSALNIR.V + Oxidation (M)  |
| 421 - 432         | 737.98   | 1473.66  | 38    | K.INFACSYPLDMK.V + Oxidation (M) |
